# Supplementary material for: Impact of a Glaucoma Severity Index on Results of Trabectome Surgery: Larger Pressure Reduction in More Severe Glaucoma
Source: PubMed Central journal article supplement (PMC4805208; doi:10.1371/journal.pone.0151926), 2016-03-23
Supplement: pone.0151926.s001.pdf [file pone.0151926.s001.pdf]

**S1 Fig.**

**A) all OAG, IOP % reduction at 1 year**

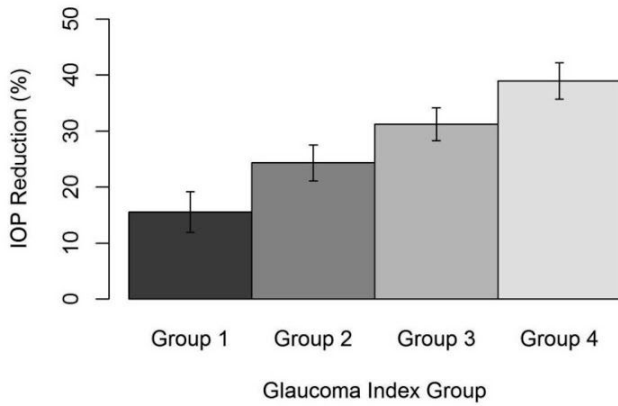

**B) POAG, IOP % reduction at 1 year**

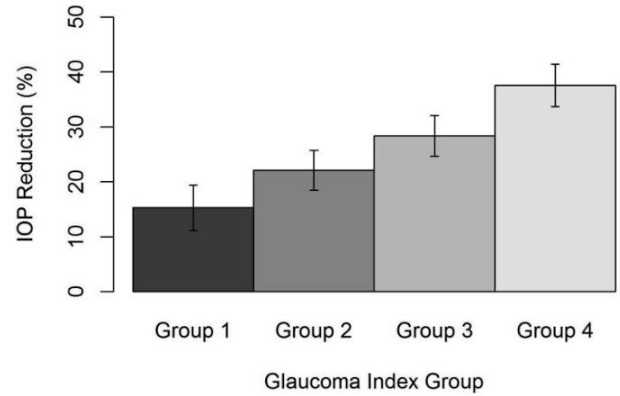

**S1 Fig. IOP reduction at 1 year as percentage of preoperative IOP.** A) In all open angle glaucoma patients, a higher glaucoma index group assignment indicating more severe glaucoma was found to be associated with a larger IOP reduction (percentage +/- 95% confidence interval). B) Primary open angle glaucoma had highly similar IOP percentage reduction at 1 year (percentage +/- 95% confidence interval).
